# Supplementary figures and images for: Deletion at 6q24.2–26 predicts longer survival of high‐grade serous epithelial ovarian cancer patients
Source: PubMed Central journal article supplement — Mol Oncol. 2014 Oct 5;9(2):422–36. doi: 10.1016/j.molonc.2014.09.010 (PMC5528660; doi:10.1016/j.molonc.2014.09.010), 2014-10-05

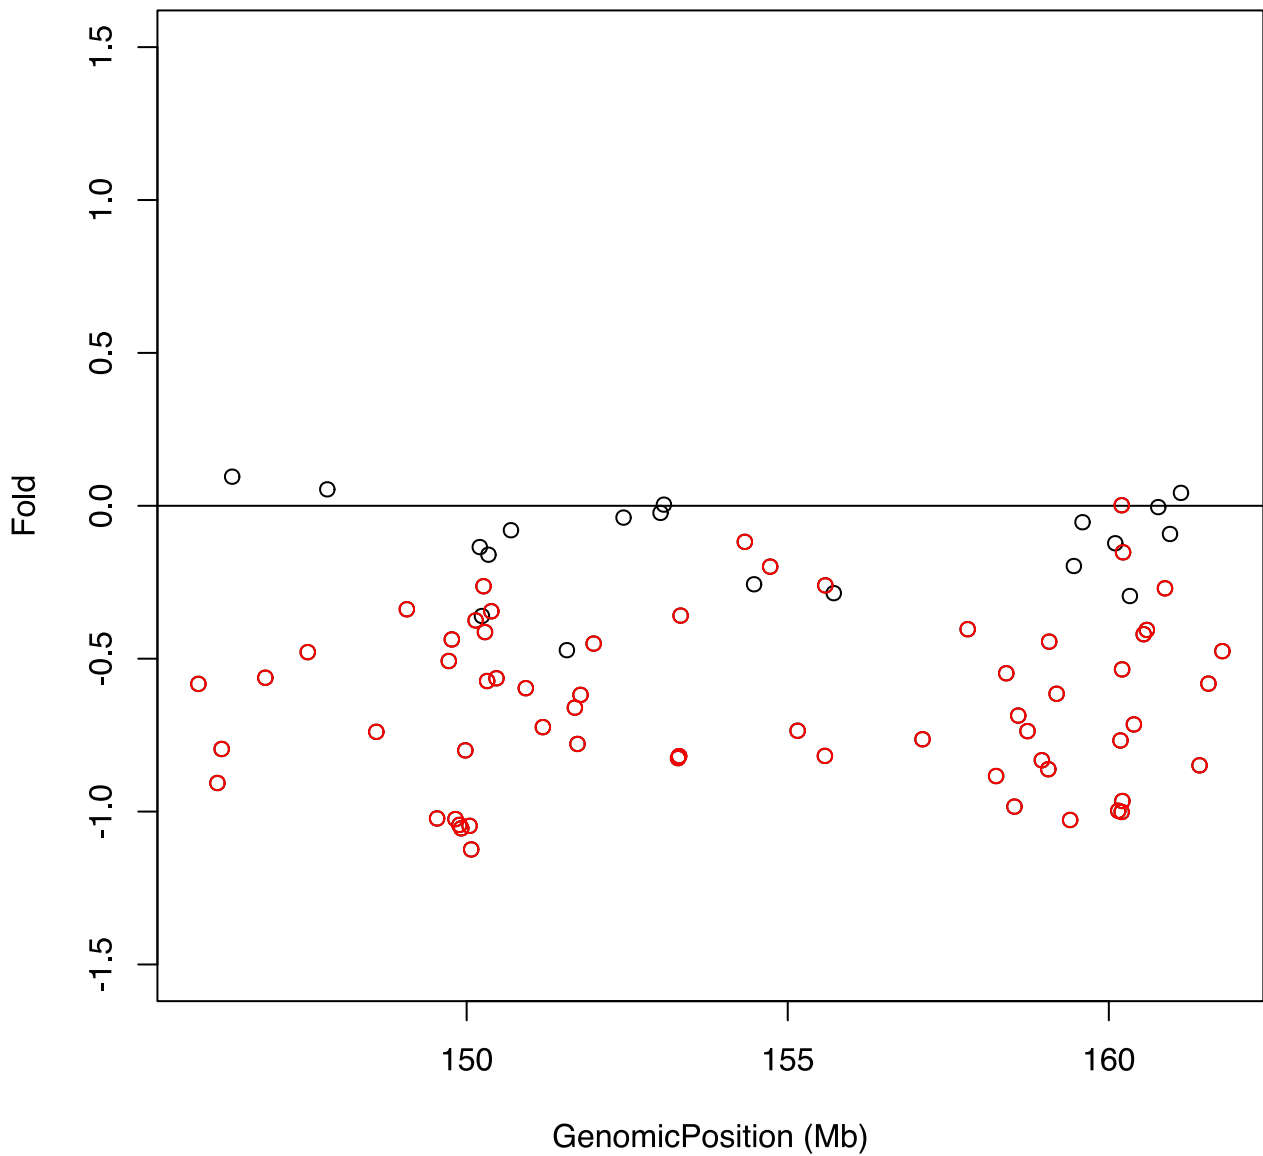

Supplement: MOL2-9-422-s001.pdf [file MOL2-9-422-s001.pdf]
